# Supplementary material for: Perspectives on exercise intensity, volume, step characteristics and health outcomes in walking for transport
Source: PubMed Central journal article supplement (PMC9635924; doi:10.3389/fpubh.2022.911863), 2022-10-21
Supplement: Table_1.pdf [file Table_1.pdf]

## Supplementary File 1

This is a supplementary file to Schantz et al. (2022).

**Supplementary Table 1.** All variables with a significant ( $p < 0.05$ ) difference between the sexes.

| Table | Variable (unit)                                                             | Absolute difference | Relative difference (%) | Effect size Hedges' correction |
|-------|-----------------------------------------------------------------------------|---------------------|-------------------------|--------------------------------|
| 1     | Height (m)                                                                  | 0.11                | 6.5                     | 1.90                           |
|       | Weight (kg)                                                                 | 19.4                | 31.7                    | 1.81                           |
|       | BMI ( $\text{kg} \cdot \text{m}^{-2}$ )                                     | 3.5                 | 16.1                    | 1.22                           |
|       | HR rest ( $\text{beats} \cdot \text{min}^{-1}$ )                            | 13.2                | 21.7                    | 1.60                           |
|       | Blood pressure, diastole (mm Hg)                                            | 8.7                 | 12.4                    | 0.94                           |
| 3     | VO <sub>2</sub> of 1 MET ( $\text{L} \cdot \text{min}^{-1}$ )               | 0.058               | 31.7                    | 1.81                           |
|       | VO <sub>2</sub> max ergometer cycling ( $\text{L} \cdot \text{min}^{-1}$ )  | 0.71                | 30.6                    | 1.90                           |
| 4     | VO <sub>2</sub> max treadmill running ( $\text{L} \cdot \text{min}^{-1}$ )  | 0.76                | 29.6                    | 2.20                           |
| 5     | Walking environment*                                                        | -0.70               | -77.8                   | -0.98                          |
| 6     | Step frequency in field ( $\text{steps} \cdot \text{min}^{-1}$ )            | -7                  | -5.9                    | -1.53                          |
|       |                                                                             |                     |                         |                                |
| 7     | VO <sub>2</sub> in field ( $\text{L} \cdot \text{min}^{-1}$ )               | 0.32                | 26.7                    | 1.18                           |
|       | VO <sub>2</sub> - 1 MET in field ( $\text{L} \cdot \text{min}^{-1}$ )       | 0.26                | 25.8                    | 1.03                           |
| 8     | Energy expenditure in field ( $\text{kcal} \cdot \text{min}^{-1}$ )         | 1.59                | 27.6                    | 1.21                           |
|       | Energy expenditure in field - 1 MET ( $\text{kcal} \cdot \text{min}^{-1}$ ) | 1.30                | 26.7                    | 1.06                           |

**Supplementary Table 1 (Continued).** All variables with a significant ( $p < 0.05$ ) difference between the sexes.

| Table | Variable (unit)                                                             | Absolute difference | Relative difference (%) | Effect size Hedges' correction |
|-------|-----------------------------------------------------------------------------|---------------------|-------------------------|--------------------------------|
| 9     | Ventilation in field ( $L \cdot \text{min}^{-1}$ )                          | 7.9                 | 25.4                    | 0.93                           |
|       | Tidal volume in field (L)                                                   | 0.41                | 32.6                    | 1.52                           |
|       | RPE leg in field                                                            | 2.0                 | 23.0                    | 1.35                           |
|       | RPE breathing in field                                                      | 1.8                 | 19.1                    | 1.03                           |
| 10    | $\text{VO}_2$ in field ( $L \cdot \text{km}^{-1}$ )                         | 3.8                 | 31.6                    | 1.23                           |
|       | $\text{VO}_2$ in field - 1 MET ( $L \cdot \text{km}^{-1}$ )                 | 3.1                 | 30.7                    | 1.11                           |
| 11    | Energy expenditure in field ( $\text{kcal} \cdot \text{km}^{-1}$ )          | 19.1                | 32.5                    | 1.26                           |
|       | Energy expenditure in field - 1 MET ( $\text{kcal} \cdot \text{km}^{-1}$ )  | 15.6                | 31.6                    | 1.14                           |
| 12    | $\text{VO}_2$ in field ( $\text{mL} \cdot \text{step}^{-1}$ )               | 3.4                 | 35.1                    | 1.40                           |
|       | $\text{VO}_2$ in field - 1 MET ( $\text{mL} \cdot \text{step}^{-1}$ )       | 2.8                 | 34.2                    | 1.25                           |
|       | Energy expenditure in field ( $\text{cal} \cdot \text{step}^{-1}$ )         | 16.8                | 36.1                    | 1.43                           |
|       | Energy expenditure in field - 1 MET ( $\text{cal} \cdot \text{step}^{-1}$ ) | 13.8                | 35.2                    | 1.27                           |

Notes: \*Walking environment: 0 = inner urban; 1 = inner urban – suburban; 2 = suburban.

Calculation of absolute sex difference = men's mean difference - women's mean difference.

Calculation of relative sex difference = (absolute sex difference  $\cdot$  women's mean difference<sup>-1</sup>)  $\cdot$  100.

According to Cohen (1988), the effect size can be interpreted as: small = 0.2, medium = 0.5, and large = 0.8.

## References

- Cohen, J. (1988). *Statistical power analysis for the behavioral sciences*. Hillsdale, N.J.: Lawrence Erlbaum Associates.
- Schantz, P., Olsson, K.S.E., Salier Eriksson, J., and Rosdahl, H. (2022). Perspectives on exercise intensity, volume, step characteristics and health outcomes in walking for transport. *Frontiers in Public Health*. 10:911863. doi: 10.3389/fpubh.2022.911863.
